# Supplementary material
Source: publisher figshare collection journal article supplement (https://tandf.figshare.com/articles/dataset/_/11365631)
Supplement: Supplementary file 1 [file 20179325]

## SUPPLEMENTARY MATERIAL

### Cytochalasins from Endophytic *Diaporthe* sp. GDG-118

Xishan Huang <sup>a,†</sup>, Dexiong Zhou <sup>a,†</sup>, Yan Liang <sup>a</sup>, Xiaobo Liu <sup>a</sup>, Fei Cao <sup>b</sup>,  
Yuyue Qin <sup>a</sup>, Tuxiang Mo <sup>a</sup>, Zhaolong Xu <sup>a</sup>, Jun Li <sup>a\*</sup>, Ruiyun Yang <sup>a,\*</sup>

<sup>a</sup> *State Key Laboratory for Chemistry and Molecular Engineering of Medicinal Resources, College of Chemistry and Pharmaceutical Sciences, Guangxi Normal University, Guilin, P. R. China;*

<sup>b</sup> *College of Pharmaceutical Sciences, Hebei University, Baoding, P. R. China*

† These authors contributed equally to this work.

\* Correspondence: : yang\_rui\_yun@163.com; lijun9593@163.com.

Tel/Fax: 86-773-2120958.

## Cytochalasins from Endophytic *Diaporthe* sp. GDG-118

### ABSTRACT

The plant *Sophora tonkinensis*, possessed a range of active compounds, was traditionally used in the medicine of Chinese minorities. Endophytic fungi were isolated from this plant, of which the fungus *Diaporthe* sp. GDG-118 was fermented and extracted with methanol. The extract was screened by antifungal and antibacterial assays leading to the discovery of two new 21-acetoxycytochalasins (**1-2**) and five known cytochalasins (**3-7**). These two new compounds were elucidated by spectroscopic analyses, and further their absolute configurations were determined by the X-ray of compound **3** and comparing their experimental CD spectra. The antibacterial and antifungal effects of these compounds were evaluated. Compound **2** showed moderate inhibitory activity against *Bacillus anthracis* and *Escherichia coli* with MIC value of 12.5  $\mu\text{g/mL}$ , and **7** showed strong antifungal activity against *Alternaria oleracea*, *Pestalotiopsis theae* and *Colletotrichum capsici* with MIC values of 3.125  $\mu\text{g/mL}$ , 1.56  $\mu\text{g/mL}$  and 1.56  $\mu\text{g/mL}$ , respectively.

### KEYWORDS

*Sophora tonkinensis*; *Diaporthe* sp.; 21-acetoxycytochalasins; antibacterial effects; antifungal effects

## List of supporting information

- Table S1.**  $^1\text{H}$  and  $^{13}\text{C}$  NMR data of compounds **1** and **2**
- Table S2.** Antifungal activities of compounds **1–7**
- Table S3.** Antibacterial activities of compounds **1–7**
- Figure S1.** Selected HMBC and  $^1\text{H}$ - $^1\text{H}$  COSY correlations of compounds **1** and **2**
- Figure S2.** The NOESY correlations of compounds **1** and **2**
- Figure S3.** X-ray structure of compound **3**
- Figure S4.** Experimental and calculated ECD spectra of compounds **1** and **2**
- Figure S5.** HRESIMS spectrum of compound **1**
- Figure S6.**  $^1\text{H}$  NMR spectrum (400 MHz, Methanol- $d_4$ ) of compound **1**
- Figure S7.**  $^{13}\text{C}$  NMR spectrum (100 MHz, Methanol- $d_4$ ) of compound **1**
- Figure S8.**  $^1\text{H}$ - $^1\text{H}$  COSY spectrum (400 MHz, Methanol- $d_4$ ) of compound **1**
- Figure S9.** HSQC spectrum (400 MHz, Methanol- $d_4$ ) of compound **1**
- Figure S10.** HMBC spectrum (400 MHz, Methanol- $d_4$ ) of compound **1**
- Figure S11.** NOESY spectrum (400 MHz, Methanol- $d_4$ ) of compound **1**
- Figure S12.** HRESIMS spectrum of compound **2**
- Figure S13.**  $^1\text{H}$  NMR spectrum (400 MHz, Methanol- $d_4$ ) of compound **2**
- Figure S14.**  $^{13}\text{C}$  NMR spectrum (100 MHz, Methanol- $d_4$ ) of compound **2**
- Figure S15.**  $^1\text{H}$ - $^1\text{H}$  COSY spectrum (400 MHz, Methanol- $d_4$ ) of compound **2**
- Figure S16.** HSQC spectrum (400 MHz, Methanol- $d_4$ ) of compound **2**
- Figure S17.** HMBC spectrum (400 MHz, Methanol- $d_4$ ) of compound **2**
- Figure S18.** NOESY spectrum (400 MHz, Methanol- $d_4$ ) of compound **2**
- Figure S19.**  $^1\text{H}$  NMR spectrum (400 MHz, Methanol- $d_4$ ) of compound **3**
- Figure S20.**  $^{13}\text{C}$  NMR spectrum (100 MHz, Methanol- $d_4$ ) of compound **3**
- Figure S21.**  $^1\text{H}$  NMR spectrum (400 MHz,  $\text{CDCl}_3$ ) of compound **4**
- Figure S22.**  $^{13}\text{C}$  NMR spectrum (100 MHz,  $\text{CDCl}_3$ ) of compound **4**
- Figure S23.**  $^1\text{H}$  NMR spectrum (400 MHz, Methanol- $d_4$ ) of compound **5**
- Figure S24.**  $^{13}\text{C}$  NMR spectrum (100 MHz, Methanol- $d_4$ ) of compound **5**
- Figure S25.**  $^1\text{H}$  NMR spectrum (400 MHz, Methanol- $d_4$ ) of compound **6**

**Figure S26.**  $^{13}\text{C}$  NMR spectrum (100 MHz, Methanol- $d_4$ ) of compound **6**

**Figure S27.**  $^1\text{H}$  NMR spectrum (400 MHz, Acetone- $d_6$ ) of compound **7**

**Figure S28.**  $^{13}\text{C}$  NMR spectrum (100 MHz, Acetone- $d_6$ ) of compound **7**

**Table S1.**  $^1\text{H}$  and  $^{13}\text{C}$  NMR data of compounds **1** (in Acetone- $d_6$ ,  $J$  in Hz) and **2** (in  $\text{CDCl}_3$ ,  $J$  in Hz)

| position | <b>1</b>                          |              | <b>2</b>                    |              |
|----------|-----------------------------------|--------------|-----------------------------|--------------|
|          | $\delta$ (H)                      | $\delta$ (C) | $\delta$ (H)                | $\delta$ (C) |
| 1        |                                   | 175.0        |                             | 174.4        |
| 2        |                                   |              | 5.59, s                     |              |
| 3        | 3.30 ( <i>m</i> )                 | 54.1         | 3.28, <i>m</i>              | 53.7         |
| 4        | 2.20 ( <i>dd</i> , $J=5.5, 2.7$ ) | 50.1         | 2.18, <i>t</i> (4.6)        | 48.1         |
| 5        | 2.70, <i>m</i>                    | 33.0         | 2.94, <i>m</i>              | 36.6         |
| 6        |                                   | 150.9        |                             | 148.9        |
| 7        | 3.68, <i>d</i> (10.2)             | 71.5         | 4.07, <i>dd</i> (12.9, 1.9) | 76.7         |
| 8        | 3.02, <i>t</i> (9.9)              | 48.5         | 2.42, <i>t</i> (12.8)       | 45.4         |
| 9        |                                   | 49.5         |                             | 47.3         |
| 10       | 2.93, <i>dd</i> (13.1, 6.3)       | 45.5         | 2.90, <i>dd</i> (13.6, 3.6) | 45.8         |
|          | 2.78, <i>m</i>                    |              | 2.53, <i>dd</i> (13.6, 9.6) |              |
| 11       | 0.62, <i>d</i> (6.8)              | 13.4         | 1.15, <i>d</i> (6.7)        | 15.2         |
| 12       | 5.08, <i>m</i> ,                  | 112.6        | 5.39, <i>m</i>              | 114.3        |
|          | 4.90, <i>m</i>                    |              | 5.21, <i>t</i> (2.2)        |              |
| 13       | 5.98, <i>dd</i> (15.4, 9.6)       | 132.2        | 1.88, <i>m</i>              | 44.9         |
| 14       | 5.65, <i>m</i>                    | 136.0        | 3.71, <i>m</i>              | 88.2         |
| 15       | 2.12, <i>m</i>                    | 44.2         | 2.00, <i>m</i>              | 40.0         |
|          | 1.95, <i>dd</i> (12.9, 4.8)       |              | 1.40, <i>m</i>              |              |
| 16       | 2.74, <i>m</i>                    | 32.4         | 2.13, <i>m</i>              | 30.5         |
| 17       | 5.23, <i>d</i> (7.3)              | 136.4        | 5.24, <i>s</i>              | 133.6        |
| 18       |                                   | 133.3        |                             | 138.2        |
| 19       | 6.70, <i>d</i> (16.5)             | 135.9        | 2.27, <i>m</i>              | 36.2         |
| 20       | 5.58, <i>dd</i> (16.5, 3.5)       | 122.8        | 2.61, <i>m</i>              | 31.7         |
|          |                                   |              | 2.08, <i>m</i>              |              |
| 21       | 5.44, <i>d</i> (3.2)              | 78.3         | 5.18, <i>t</i> (2.7)        | 73.6         |
| 22       | 1.00, <i>d</i> (6.9)              | 24.3         | 1.11, <i>d</i> (7.1)        | 24.8         |
| 23       | 1.77, <i>s</i>                    | 21.0         | 1.72, <i>s</i>              | 23.8         |
| 24       |                                   | 170.5        |                             | 170.4        |
| 25       | 2.30, <i>s</i>                    | 21.0         | 2.12, <i>s</i>              | 21.4         |
| 1'       |                                   | 138.7        |                             | 137.3        |
| 2'/6'    | 7.25, <i>m</i>                    | 130.6        | 7.13, <i>m</i>              | 129.2        |
| 3'/5'    | 7.30, <i>m</i>                    | 129.3        | 7.32, <i>m</i>              | 129.1        |
| 4'       | 7.23, <i>m</i>                    | 127.4        | 7.26, <i>m</i>              | 127.3        |

**Table S2.** Antifungal activities of compounds 1–7

| Compounds   | Strains (MIC, $\mu\text{g/mL}$ ) |                       |                       |                     |
|-------------|----------------------------------|-----------------------|-----------------------|---------------------|
|             | <i>Alternaria</i>                | <i>Pestalotiopsis</i> | <i>Colletotrichum</i> | <i>Ceratocystis</i> |
|             | <i>oleracea</i>                  | <i>theae</i>          | <i>capsici</i>        | <i>paradoxa</i>     |
| <b>1</b>    | 50                               | 50                    | 100                   | 100                 |
| <b>2</b>    | 50                               | 50                    | 100                   | 100                 |
| <b>3</b>    | 6.25                             | 12.5                  | 6.25                  | 25                  |
| <b>4</b>    | 6.25                             | 6.25                  | 100                   | 100                 |
| <b>5</b>    | 100                              | 25                    | 100                   | 100                 |
| <b>6</b>    | 100                              | 25                    | 100                   | 100                 |
| <b>7</b>    | 3.125                            | 1.56                  | 1.56                  | 100                 |
| Carbendazim | 1.56                             | 1.56                  | 1.56                  | 100                 |

**Table S3.** Antibacterial activities of compounds 1–7

| Compounds  | Strains (MIC, $\mu\text{g/mL}$ ) |                   |                 |                 |                    |                    |
|------------|----------------------------------|-------------------|-----------------|-----------------|--------------------|--------------------|
|            | <i>Bacillus</i>                  | <i>Bacillus</i>   | <i>Bacillus</i> | <i>Proteus</i>  | <i>Escherichia</i> | <i>Salmonella</i>  |
|            | <i>subtilis</i>                  | <i>megaterium</i> | <i>anthraci</i> | <i>vuigaris</i> | <i>coli</i>        | <i>paratyphi B</i> |
| <b>1</b>   | 25                               | 50                | 50              | 100             | 25                 | 50                 |
| <b>2</b>   | 25                               | 50                | 12.5            | 100             | 12.5               | 50                 |
| <b>3</b>   | 50                               | 25                | 50              | -               | 50                 | 100                |
| <b>4</b>   | 50                               | 25                | 25              | -               | 50                 | 100                |
| <b>5</b>   | 100                              | 50                | 25              | 100             | 100                | 50                 |
| <b>6</b>   | 50                               | 100               | 100             | 50              | 25                 | 50                 |
| <b>7</b>   | 100                              | 50                | 100             | 50              | 50                 | 50                 |
| Ampicillin | 3.125                            | 3.125             | 3.125           | 1.56            | 3.125              | 12.5               |

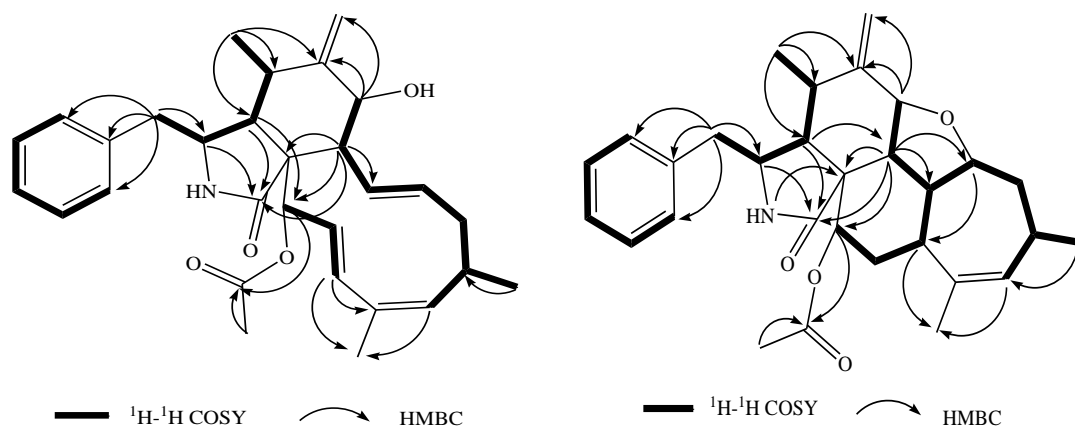

**Figure S1.** Selected HMBC and  $^1\text{H}$ - $^1\text{H}$  COSY correlations of compounds **1** and **2**

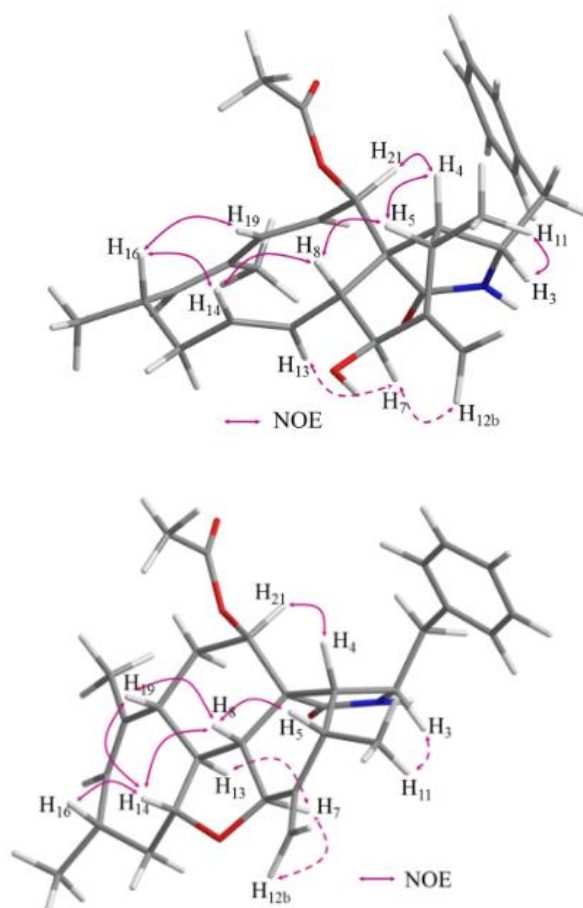

**Figure S2.** The NOESY correlations of compounds **1** and **2**

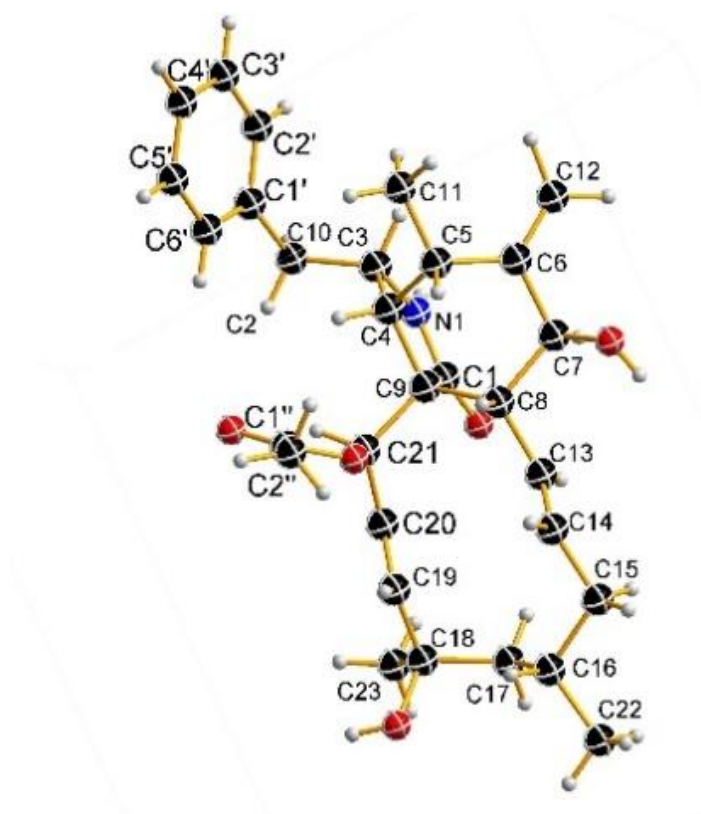

**Figure S3.** X-ray structure of compound **3**

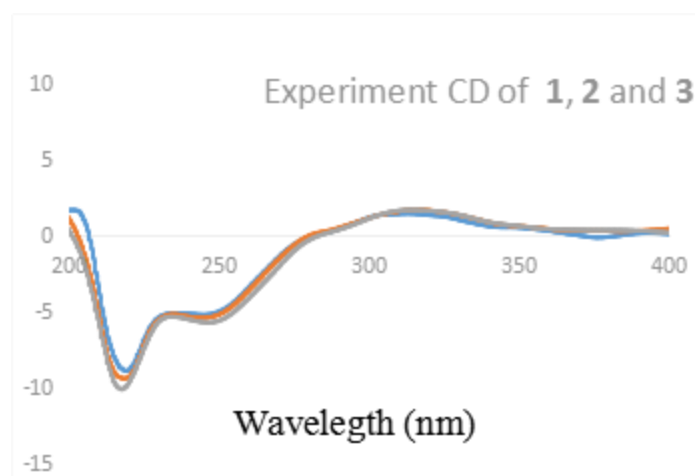

**Figure S4.** Experimental and calculated ECD spectra of compounds **1** and **2**



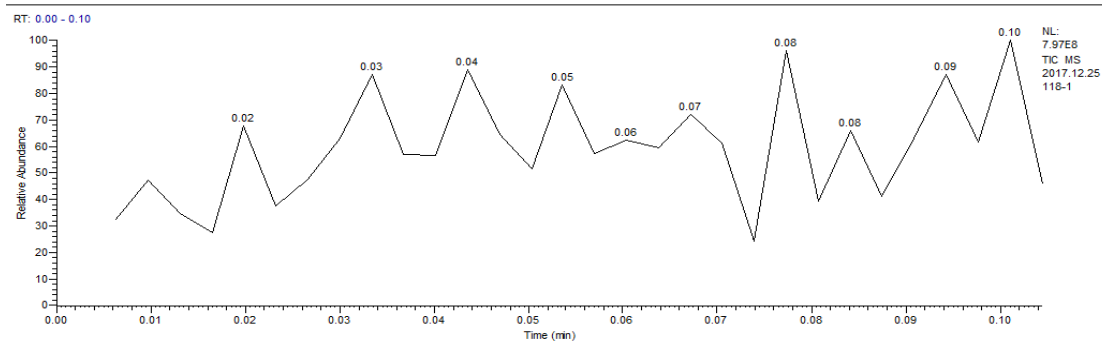

2017.12.25118-1 #9-19 RT: 0.03-0.07 AV: 11 NL: 8.00E7  
T: FTMS + p APCI corona Full ms [200.00-1000.00]

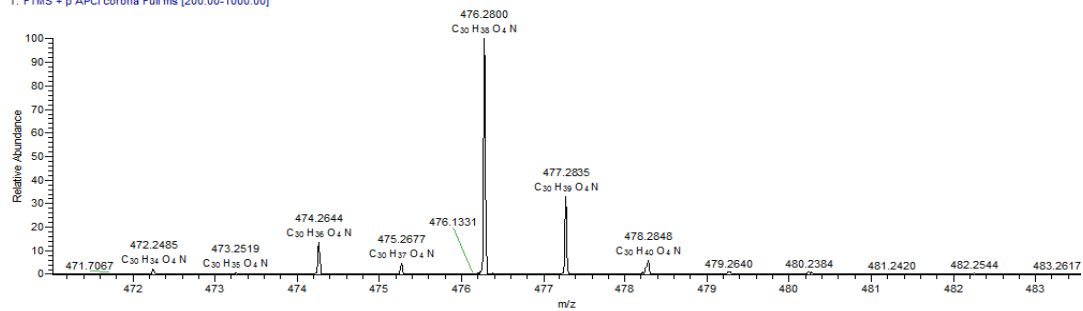

Figure S5. HRMS spectrum of compound 1

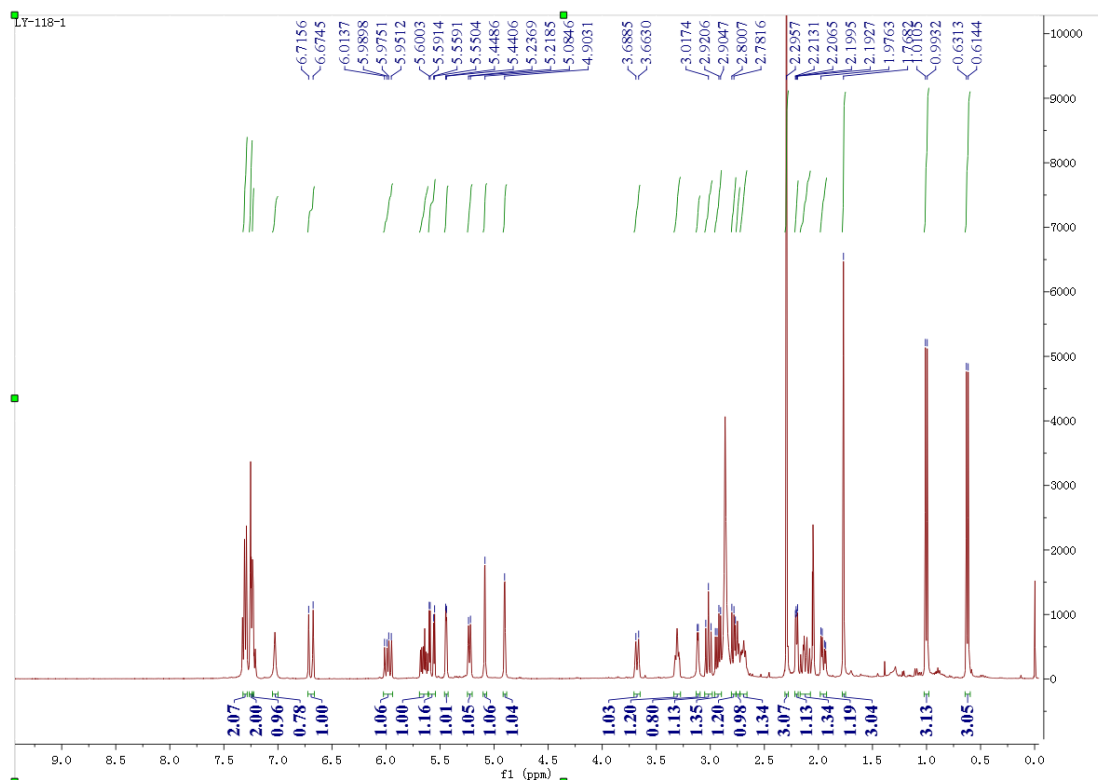

Figure S6. <sup>1</sup>H NMR spectrum (400 MHz, Methanol-*d*<sub>4</sub>) of compound 1

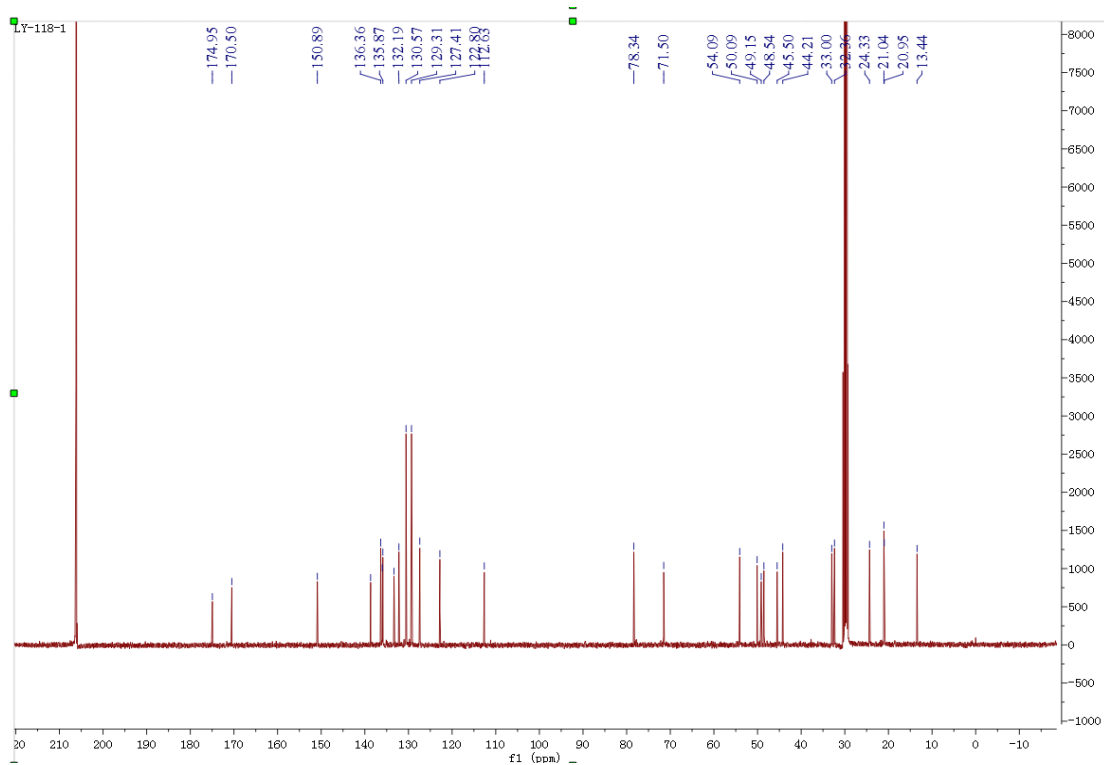

Figure S7.  $^{13}\text{C}$  NMR spectrum (100 MHz, Methanol- $d_4$ ) of compound 1

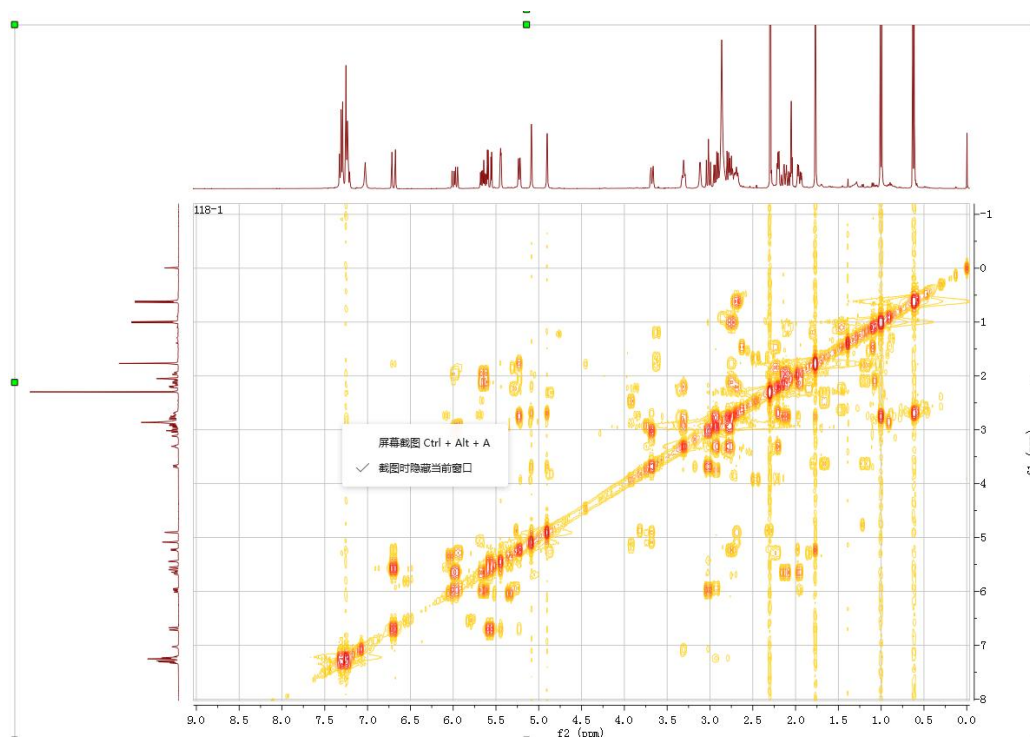

Figure S8.  $^1\text{H}$ - $^1\text{H}$  COSY spectrum (400 MHz, Methanol- $d_4$ ) of compound 1

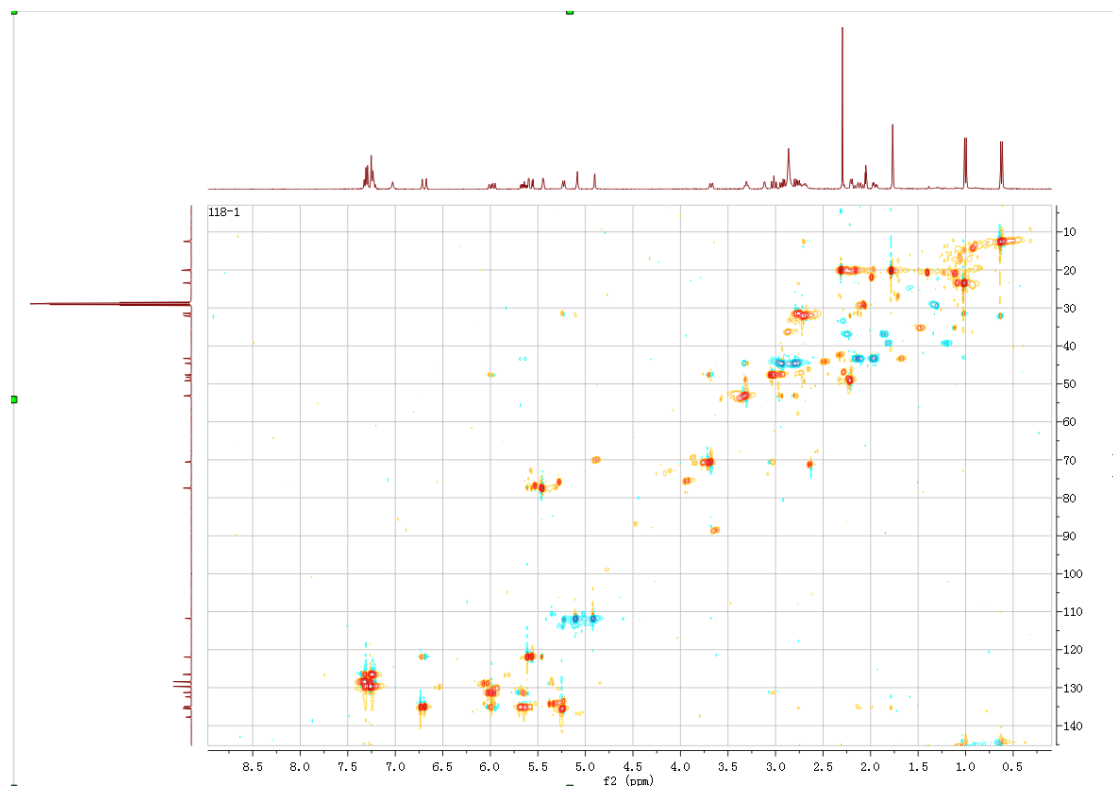

**Figure S9.** HSQC spectrum (400 MHz, Methanol- $d_4$ ) of compound **1**

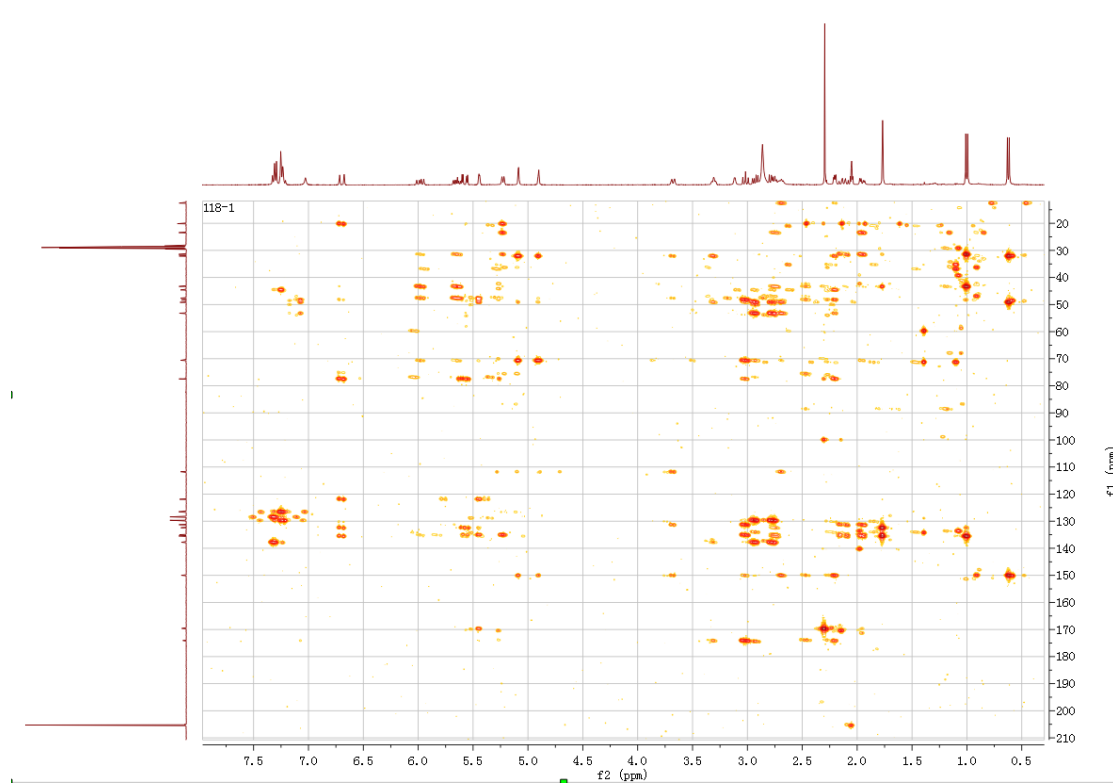

**Figure S10.** HMBC spectrum (400 MHz, Methanol- $d_4$ ) of compound **1**

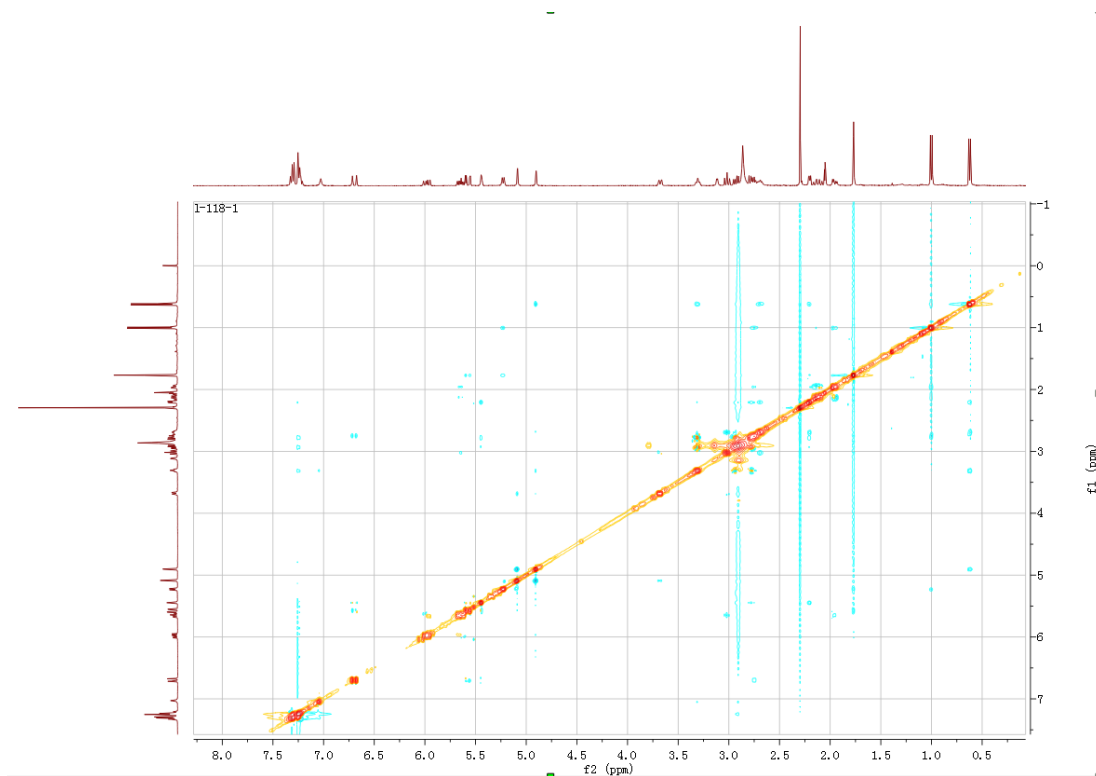

**Figure S11.** NOESY spectrum (400 MHz, Methanol- $d_4$ ) of compound **1**

H:\Yang rui yun\2018.5.2\LY-118-11

03/14/18 10:21:11

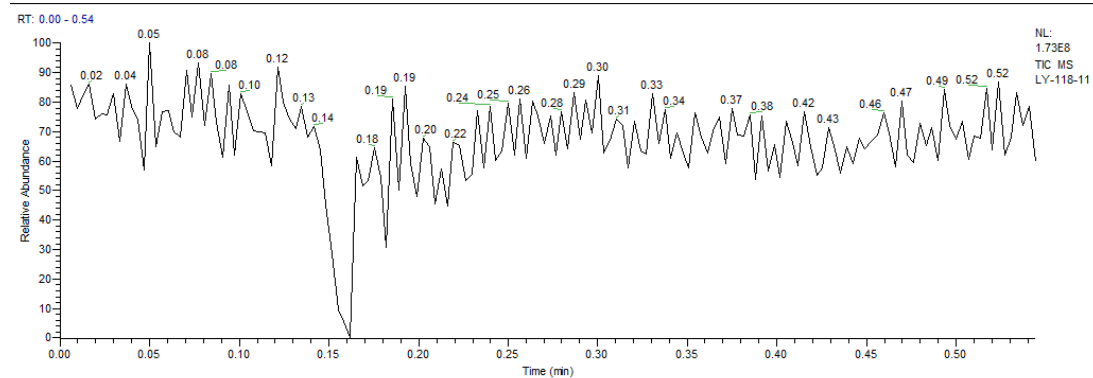

LY-118-11 #1 RT: 0.01 AV: 1 NL: 2.60E7  
T: FTMS + p ESI Full lock ms [300.00-600.00]

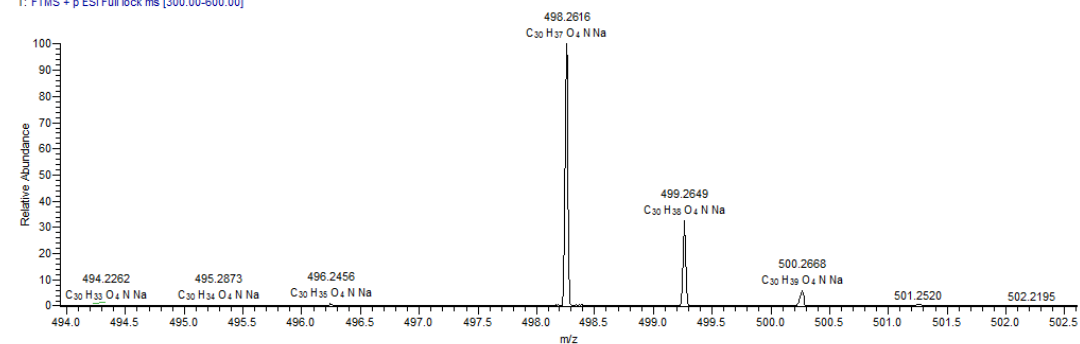

**Figure S12.** HRMS spectrum of compound **2**

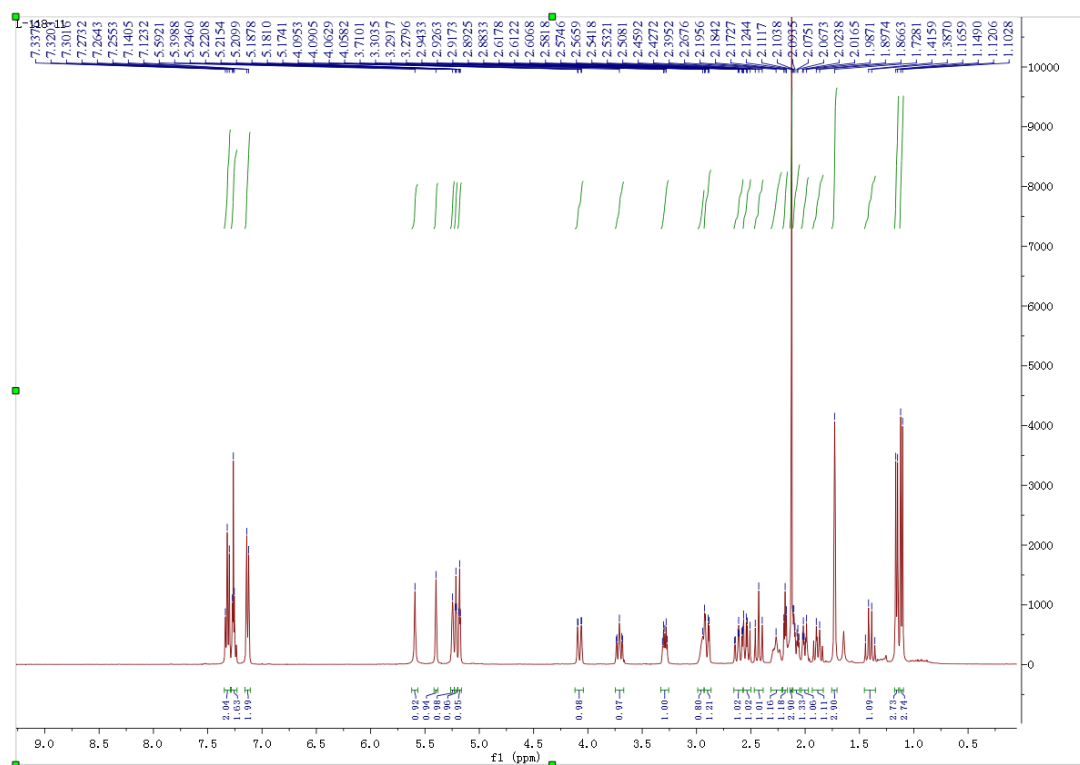

Figure S13.  $^1\text{H}$  NMR spectrum (400 MHz, Methanol- $d_4$ ) of compound 2

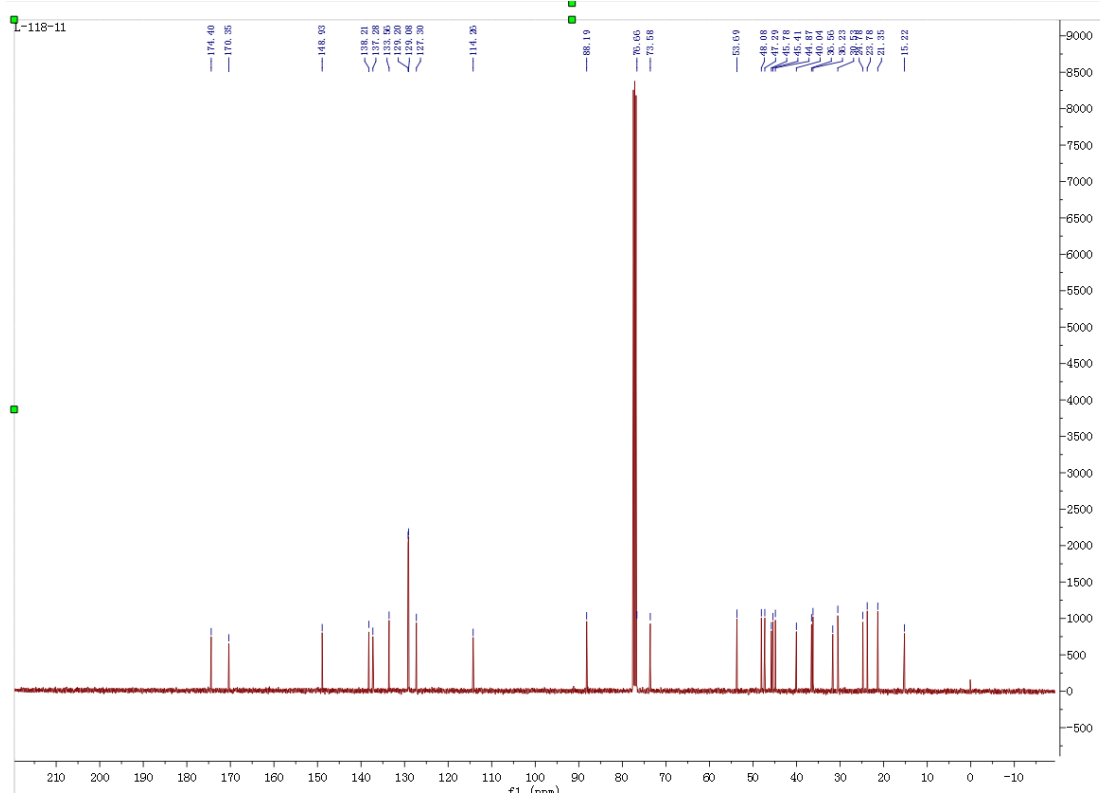

Figure S14.  $^{13}\text{C}$  NMR spectrum (100 MHz, Methanol- $d_4$ ) of compound 2

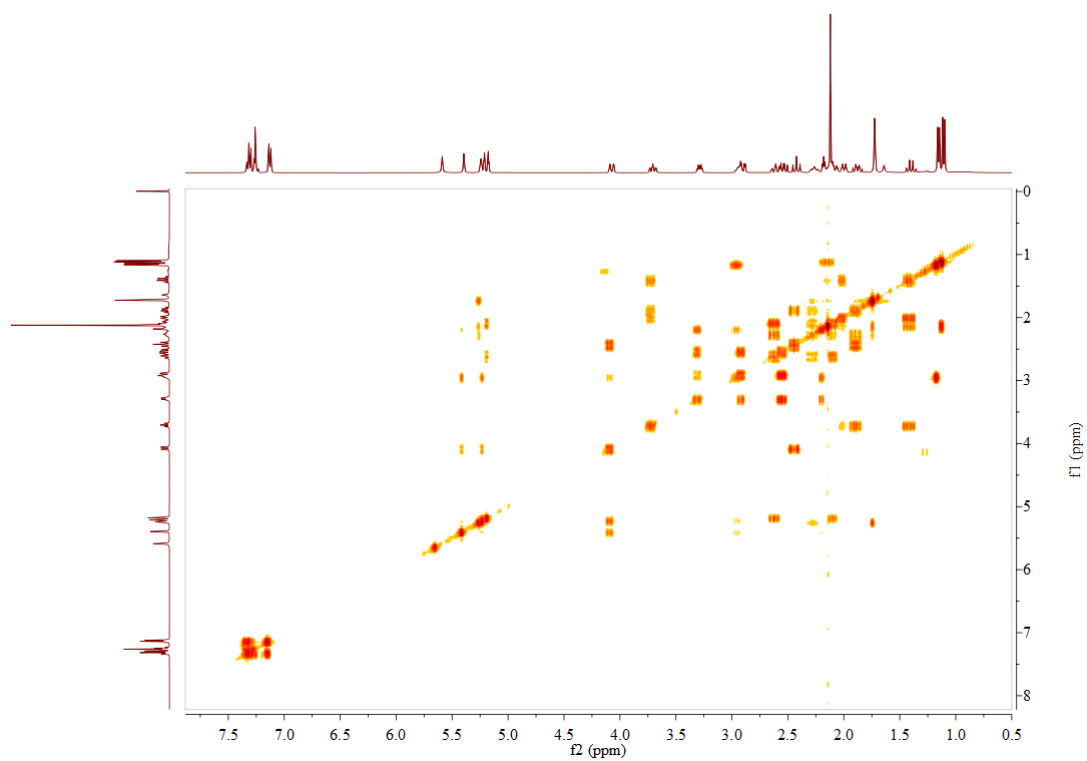

**Figure S15.** <sup>1</sup>H-<sup>1</sup>H COSY spectrum (400 MHz, Methanol-*d*<sub>4</sub>) of compound **2**

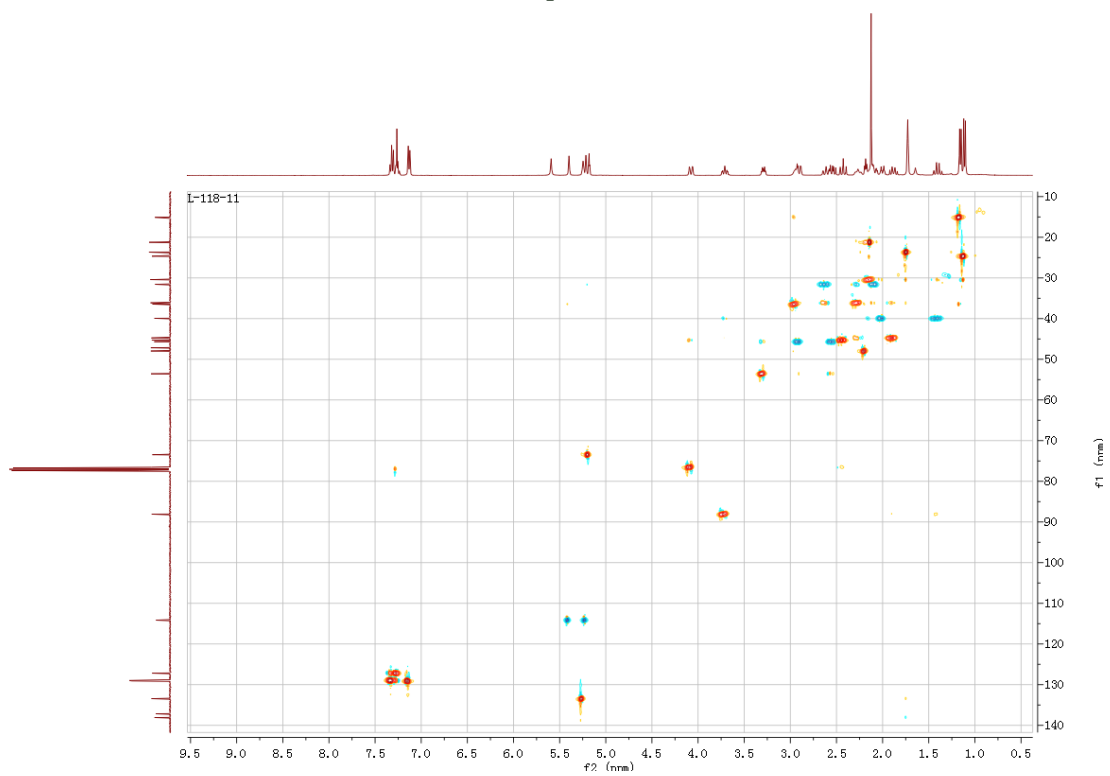

**Figure S16.** HSQC spectrum (400 MHz, Methanol-*d*<sub>4</sub>) of compound **2**

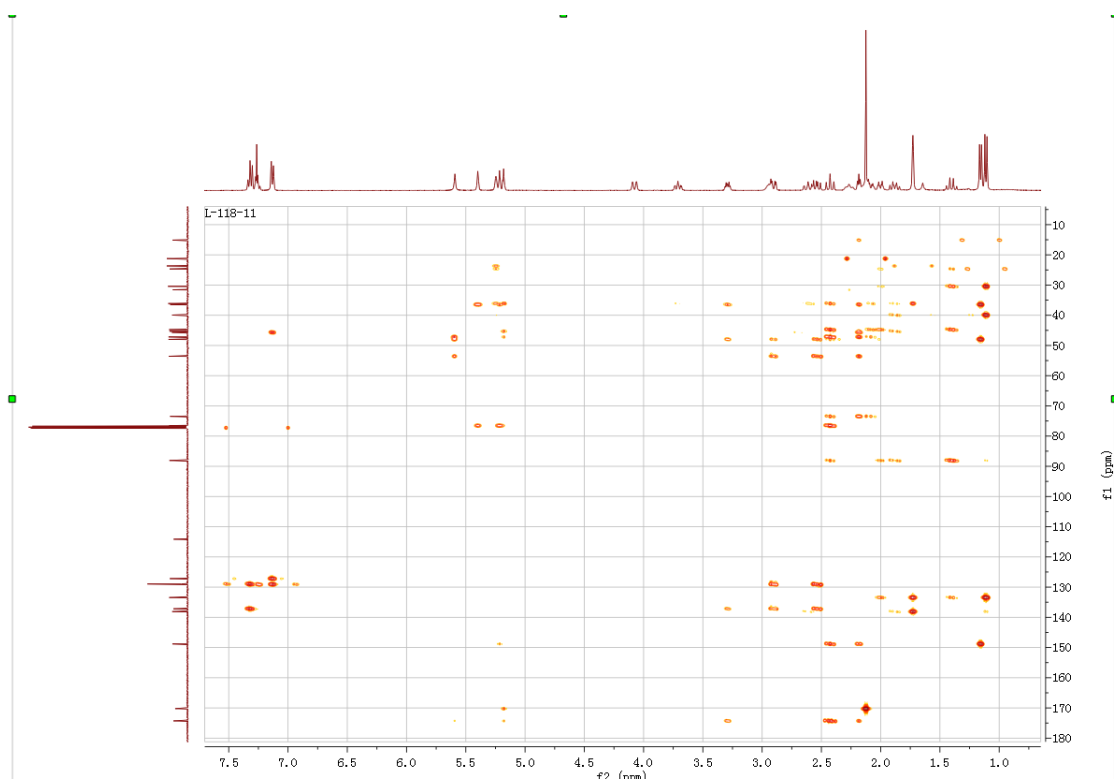

**Figure S17.** HMBC spectrum (400 MHz, Methanol- $d_4$ ) of compound **2**

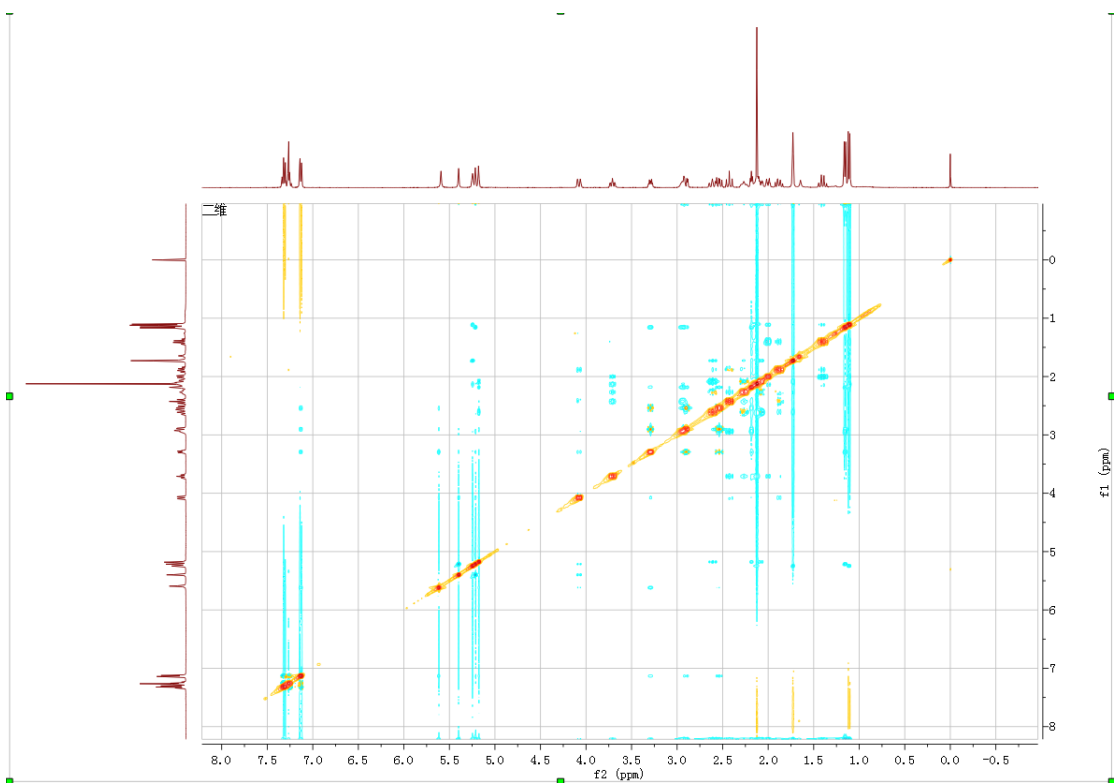

**Figure S18.** NOESY spectrum (400 MHz, Methanol- $d_4$ ) of compound **2**

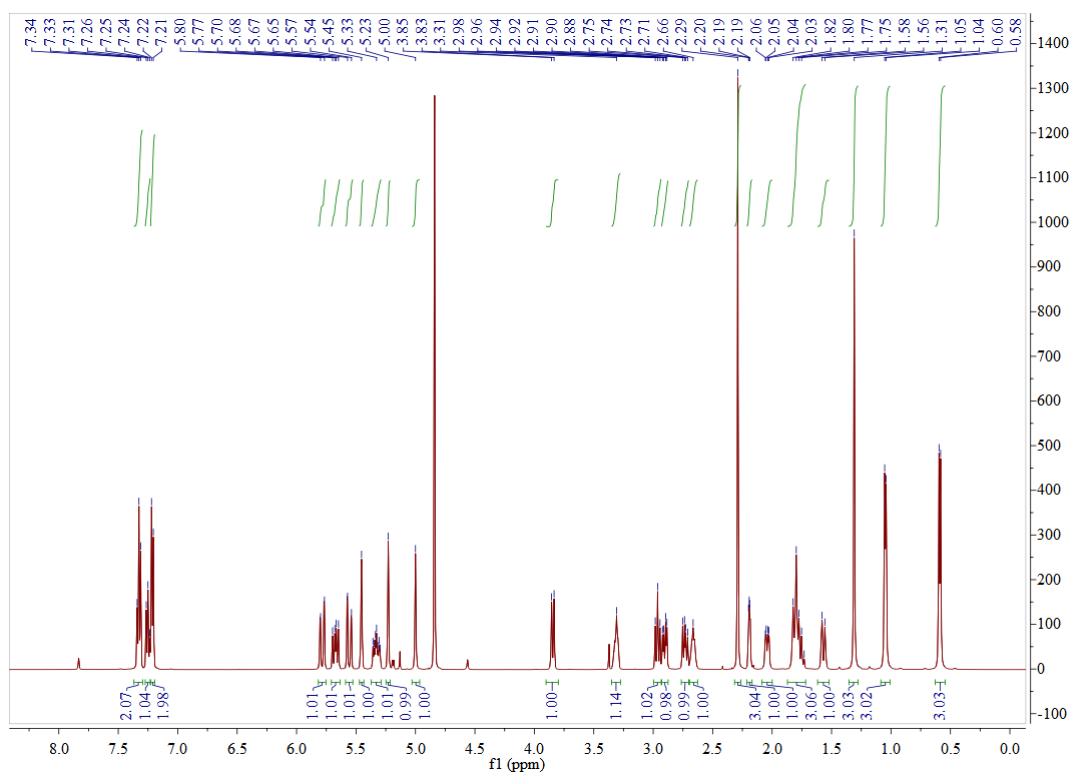

**Figure S19.**  $^1\text{H}$  NMR spectrum (400 MHz, Methanol- $d_4$ ) of compound **3**

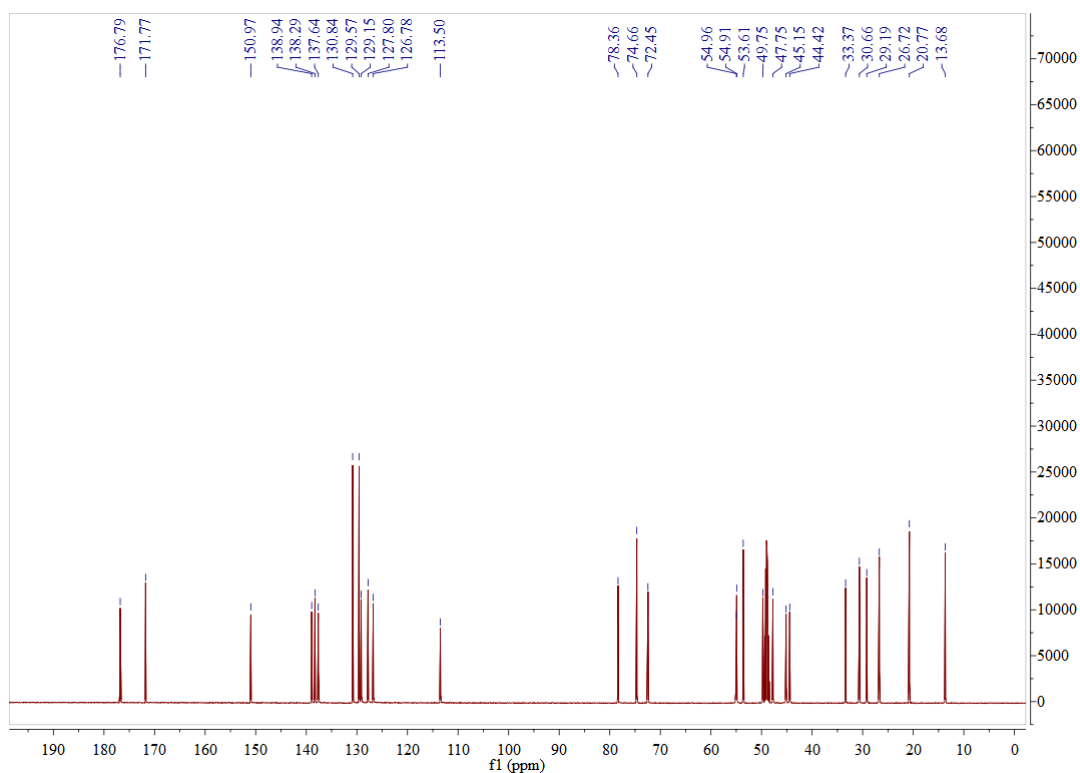

**Figure S20.**  $^{13}\text{C}$  NMR spectrum (100 MHz, Methanol- $d_4$ ) of compound **3**



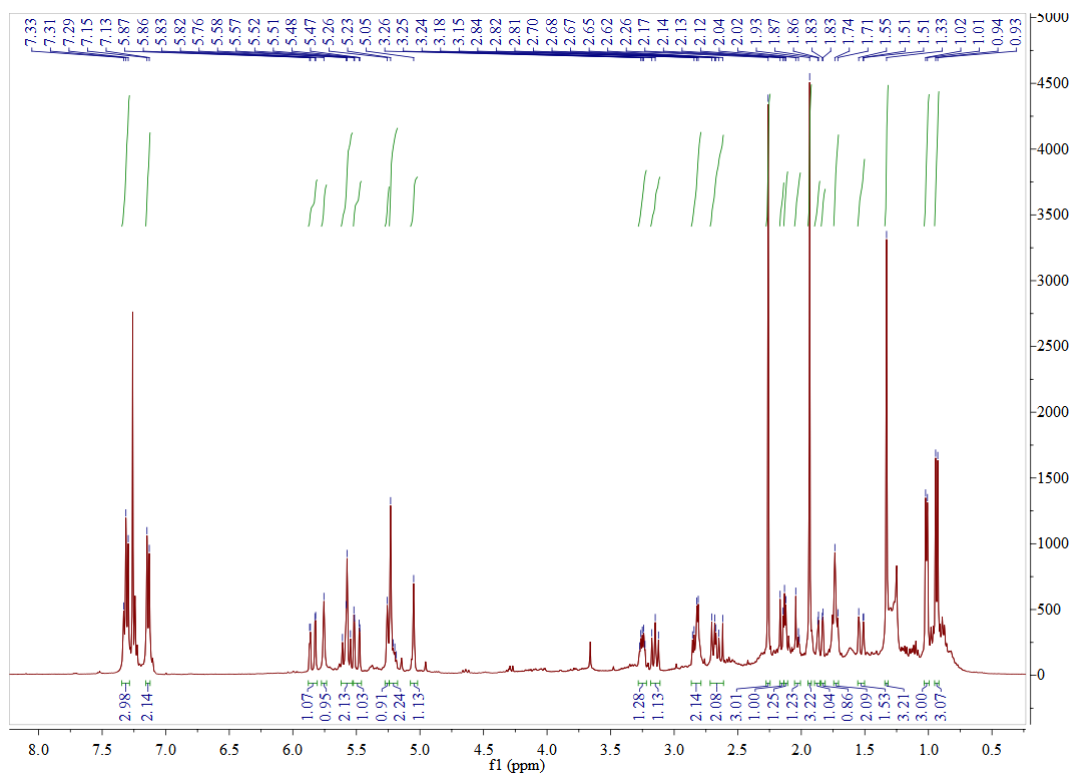

Figure S21.  $^1\text{H}$  NMR spectrum (400 MHz,  $\text{CDCl}_3$ ) of compound 4

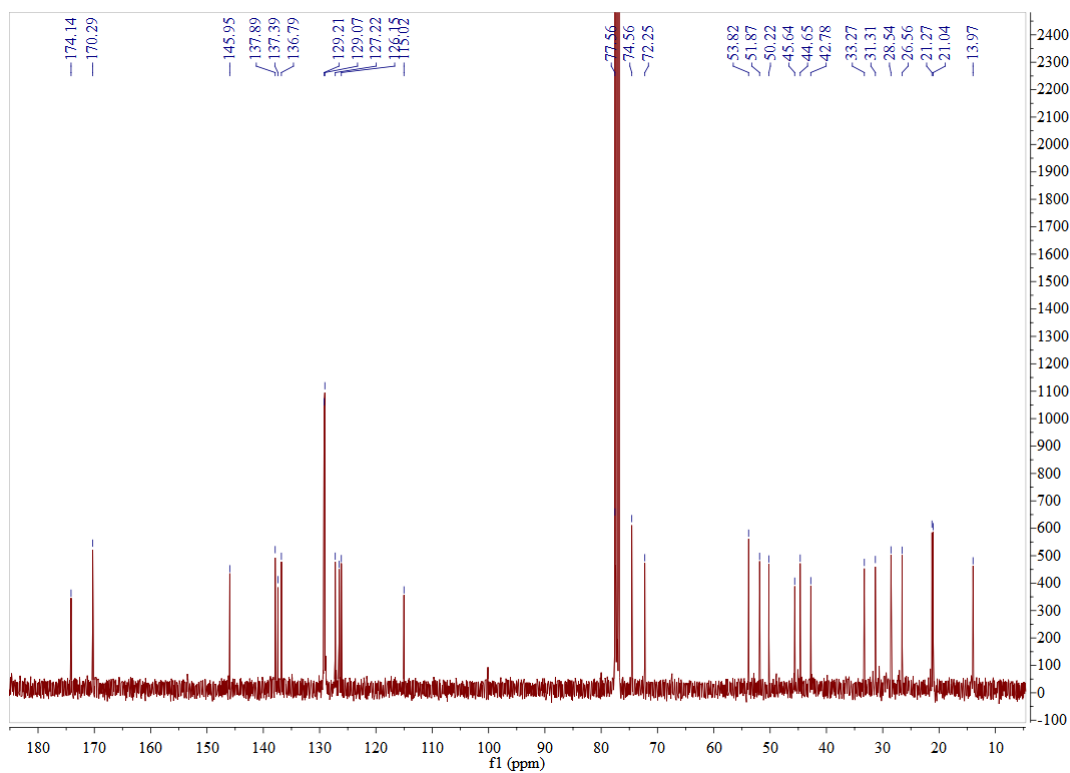

Figure S22.  $^{13}\text{C}$  NMR spectrum (100 MHz,  $\text{CDCl}_3$ ) of compound 4

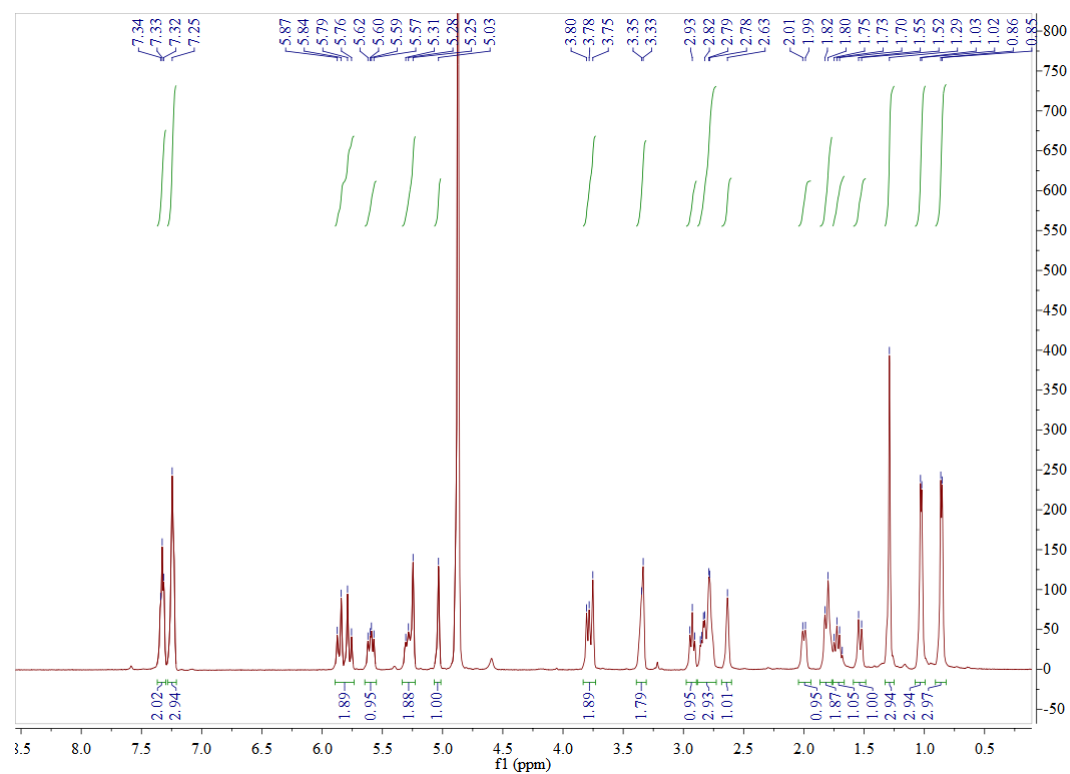

Figure S23.  $^1\text{H}$  NMR spectrum (400 MHz,  $\text{Methanol-}d_4$ ) of compound **5**

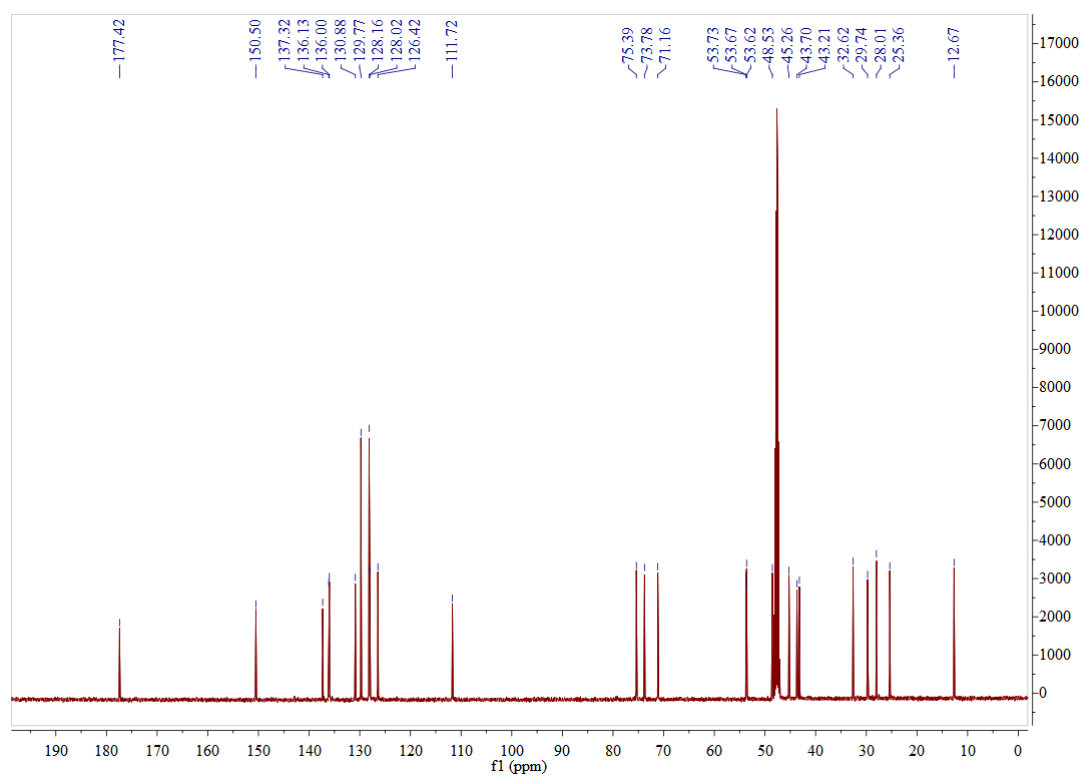

Figure S24.  $^{13}\text{C}$  NMR spectrum (100 MHz,  $\text{Methanol-}d_4$ ) of compound **5**

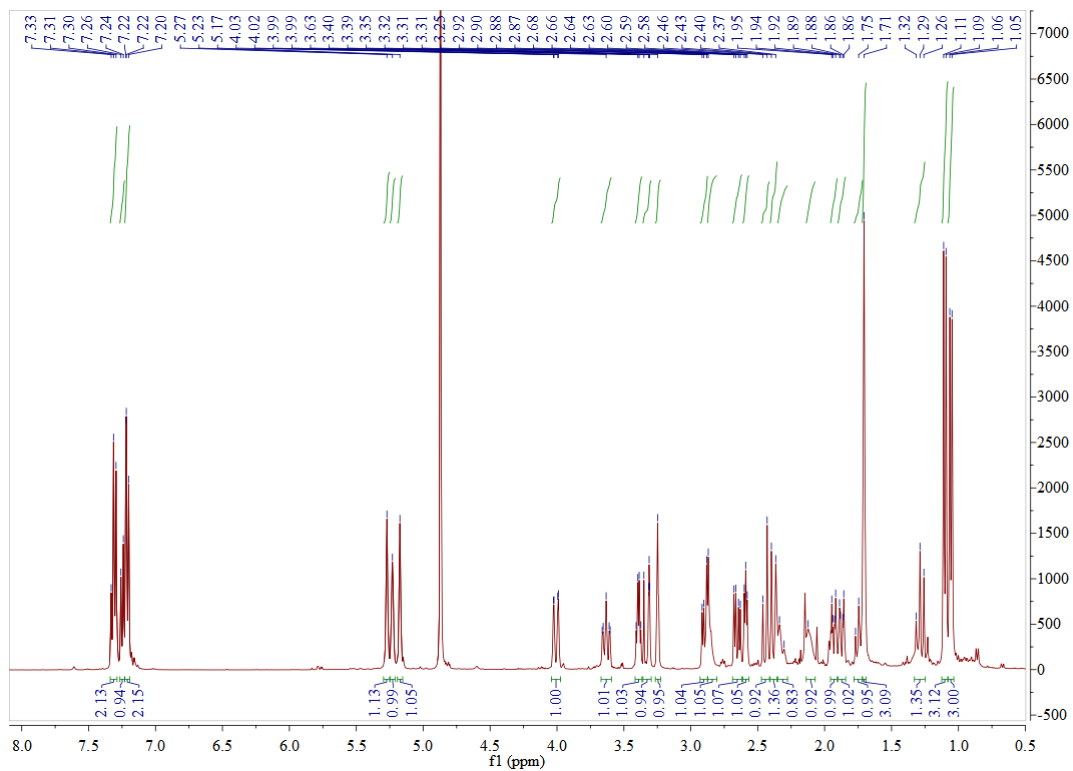

Figure S25.  $^1\text{H}$  NMR spectrum (400 MHz, Methanol- $d_4$ ) of compound **6**

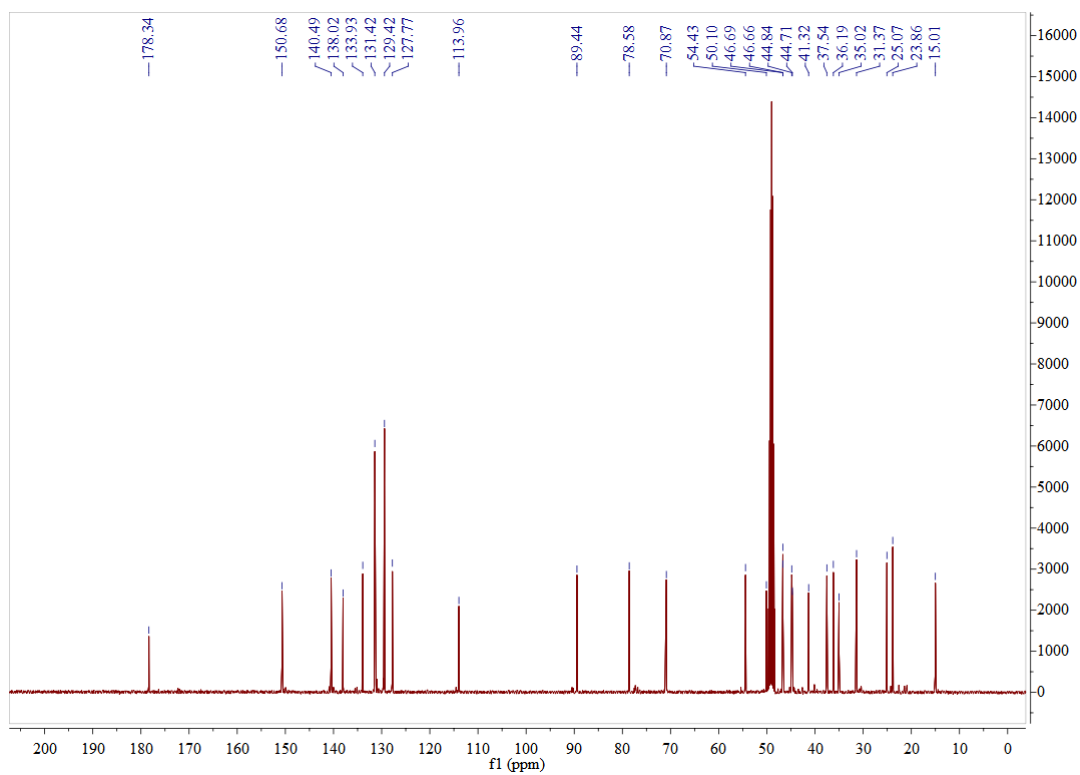

Figure S26.  $^{13}\text{C}$  NMR spectrum (100 MHz, Methanol- $d_4$ ) of compound **6**

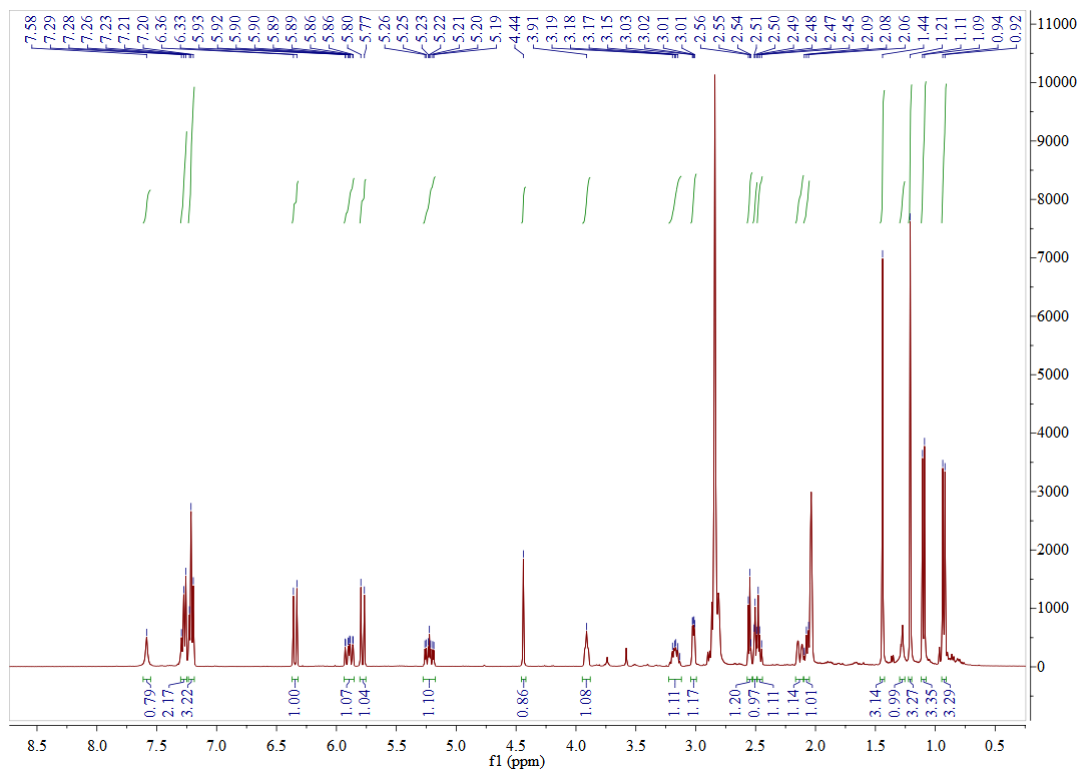

Figure S27.  $^1\text{H}$  NMR spectrum (400 MHz, Acetone- $d_6$ ) of compound 7

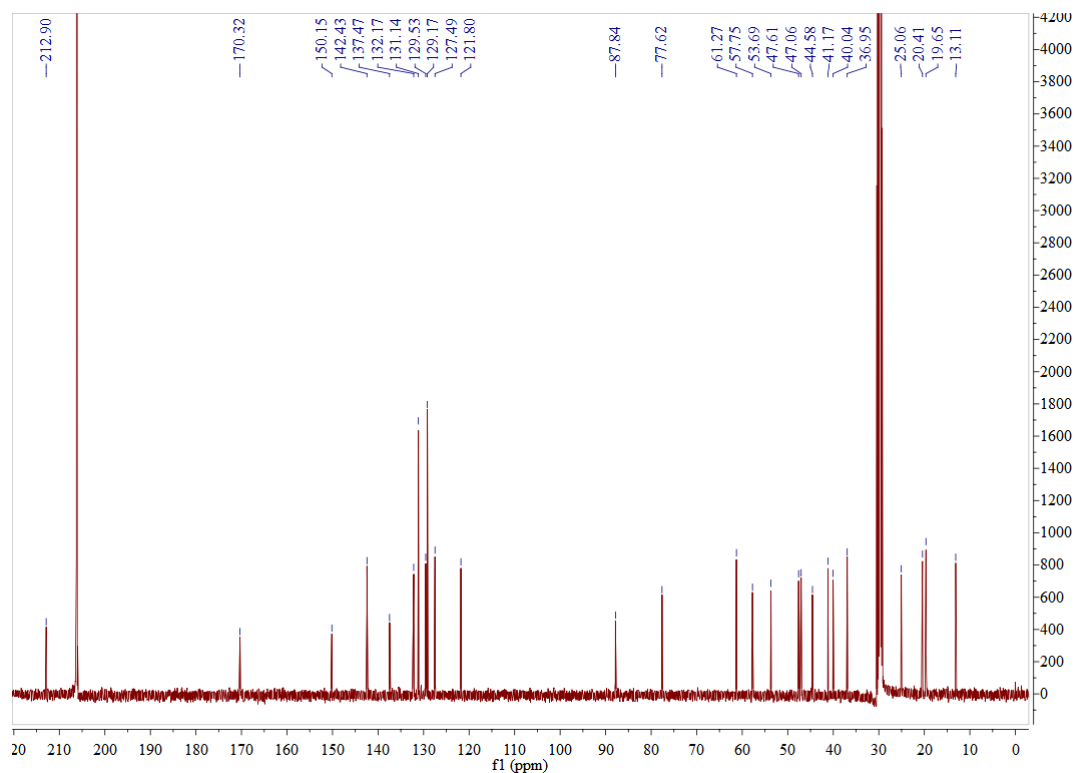

Figure S27.  $^{13}\text{C}$  NMR spectrum (400 MHz, Acetone- $d_6$ ) of compound 7
